# Supplementary material for: Enhanced Metabolic Effects of Fish Oil When Combined with Vitamin D in Diet-Induced Obese Male Mice
Source: MDPI journal article supplement (doi:10.3390/biom14040474), 2024-04-12
Supplement: s1 [file s1]

**Table S1.** Diet composition.

|                          | High Fat-Fish oil |       | High Fat |       | High Fat + Vit D |       | High Fat-Fish oil + vit D |       |
|--------------------------|-------------------|-------|----------|-------|------------------|-------|---------------------------|-------|
|                          | g                 | kcal% | g        | kcal% | g                | kcal% | g                         | kcal% |
| Protein                  | 24.2              | 20    | 24.2     | 20    | 24.2             | 20    | 24.2                      | 20    |
| Carbohydrate             | 38.2              | 32    | 38.2     | 32    | 38.2             | 32    | 38.2                      | 32    |
| Fat                      | 26                | 48    | 26       | 48    | 26               | 48    | 26                        | 48    |
| Total                    |                   | 100   |          | 100   |                  | 100   |                           | 100   |
| kcal/g                   | 4.84              |       | 4.84     |       | 4.84             |       | 4.84                      |       |
|                          |                   |       |          |       |                  |       |                           |       |
| Ingredient               | g                 | kcal  | g        | kcal  | g                | kcal  | g                         | kcal  |
| Casein, 30 mesh          | 200               | 800   | 200      | 800   | 200              | 800   | 200                       | 800   |
| L-Cystine                | 3                 | 12    | 3        | 12    | 3                | 12    | 3                         | 12    |
| Corn Starch              | 38                | 152   | 38       | 152   | 38               | 152   | 38                        | 152   |
| Maltodextrin 10          | 100               | 400   | 100      | 400   | 100              | 400   | 100                       | 400   |
| Sucrose                  | 173               | 691   | 173      | 691   | 173              | 691   | 173                       | 691   |
| Cellulose                | 50                | 0     | 50       | 0     | 50               | 0     | 50                        | 0     |
| Soybean Oil              | 25                | 225   | 25       | 225   | 25               | 225   | 25                        | 225   |
| Lard                     | 144               | 1296  | 193      | 1737  | 144              | 1296  | 193                       | 1737  |
| Vitamin D IU             | 200               | 0     | 200      | 0     | 1000             | 0     | 1000                      | 0     |
| Menhaden Oil, Nutegrity  | 49                | 441   | 0        | 0     | 49               | 441   | 0                         | 0     |
| Mineral Mix, S10026      | 10                | 0     | 10       | 0     | 10               | 0     | 10                        | 0     |
| DiCalcium Phosphate      | 13                | 0     | 13       | 0     | 13               | 0     | 13                        | 0     |
| Calcium Carbonate        | 5.5               | 0     | 5.5      | 0     | 5.5              | 0     | 5.5                       | 0     |
| Potassium Citrate, 1 H2O | 16.5              | 0     | 16.5     | 0     | 16.5             | 0     | 16.5                      | 0     |
| Vitamin Mix, V10001      | 10                | 40    | 10       | 40    | 10               | 40    | 10                        | 40    |

|                                   |            |             |            |             |            |             |            |             |
|-----------------------------------|------------|-------------|------------|-------------|------------|-------------|------------|-------------|
| Choline Bitartrate                | 2          | 0           | 2          | 0           | 2          | 0           | 2          | 0           |
| Vitamin E Acetate, 50% (500 IU/g) | 0.13       | 0           | 0.13       | 0           | 0.13       | 0           | 0.13       | 0           |
| <b>Total</b>                      | <b>839</b> | <b>4057</b> | <b>839</b> | <b>4057</b> | <b>839</b> | <b>4057</b> | <b>839</b> | <b>4057</b> |

**Table S2.** Primer Information

| <b>Primer Name</b> | <b>Forward</b>         | <b>Reverse</b>         |
|--------------------|------------------------|------------------------|
| Fasn               | TGTATCCTGCTGTCCAACCT   | GGCTTGTCTGCTCTAACTG    |
| Ppara              | ATCCACGAAGCCTACCTGAA   | AATCGGACCTCTGCCTCTT    |
| Cpt1a              | GAGACAGACACCATCCAACAC  | GAGCCAGACCTTGAAGTAACG  |
| Cpt2               | CAGCACAGCATCGTACCCA    | TCCCAATGCCGTTCTCAAAAT  |
| Mcp-1              | ACTTCTATGCCTCCTGCTCAT  | CCTGCTTGTGATTCTCCTGTAG |
| DGat2              | CCTCATCGCCGCCTACTC     | GAGCCAGGTGACAGAGAAGAT  |
| Chrebp             | GACTCGGACTCGGATACG     | GCTGTGGATGACCTGTGA     |
| Pklr               | TTCCTCCGAGTTGGTGAT     | TGGCTAGATGGCAGATGT     |
| G6p                | AACGCCTTCTATGTCCTCTTTC | GTTGCTGTAGTAGTCGGTGTCC |
| 18S                | GTTGCTGTAGTAGTCGGTGTCC | TGCCAGAGTCTCGTTCGTTA   |
